# Supplementary material for: Laccase catalyzed grafting of –N–OH type mediators to lignin via radical–radical coupling
Source: Royal Society of Chemistry journal article supplement (doi:10.1039/c6ra26106j), 2017-01-01
Supplement: c6ra26106j1.pdf [file c6ra26106j1.pdf]

- Supplementary data: Laccase catalyzed grafting of -N-OH type mediators to lignin via radical-radical
- coupling
- Line Munk, Arjen M. Punt, Mirjam A. Kabel, Anne S. Meyer

4 **Table S1.** Identified lignin residues from pyrograms of WSL and BOL samples.

| Peak No.<br>Compound<br>CAS number      | Chemical structure                                                                  | Peak No.<br>Compound<br>CAS number                   | Chemical structure                                                                  | Peak No.<br>Compound<br>CAS number               | Chemical structure                                                                    |
|-----------------------------------------|-------------------------------------------------------------------------------------|------------------------------------------------------|-------------------------------------------------------------------------------------|--------------------------------------------------|---------------------------------------------------------------------------------------|
| 1G<br>Guaiacol<br>90051                 | 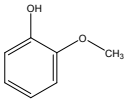   | 11G<br>Vanillin<br>121335                            |    | 21S<br>Homosyringaldehyde<br>-                   |    |
| 2G<br>4-methylguaiacol<br>93516         |    | 12G<br>Acetovanillone<br>498022                      |    | 22S<br>Acetosyringone<br>2478388                 |    |
| 3G<br>4-ethylguaiacol<br>2785899        |    | 13G<br>Propiovanillone<br>1835149                    |    | 23G<br><i>Trans</i> -coniferyl-alcohol<br>458355 |    |
| 4G<br>4-vinylguaiacol<br>7786610        |   | 14S<br>4-vinylsyringol<br>28343228                   |   | 24G<br><i>Trans</i> -coniferaldehyde<br>458366   |   |
| 5G<br>Eugenol<br>97530                  |  | 15G<br>Guaiacylacetone<br>2503460                    |  | 25S<br>Syringylacetone<br>19037582               |  |
| 6G<br>4-propylguaiacol<br>2785877       |  | 16S<br>4-allyl-syringol<br>6627889                   |  | 26S<br><i>Cis</i> -sinapyl-alcohol<br>537337     |  |
| 7S<br>Syringol<br>91101                 |  | 17S<br><i>Cis</i> -4-propenyl syringol<br>26624135   |  | 27S<br><i>Trans</i> -sinapyl-alcohol<br>537337   |  |
| 8G<br><i>Cis</i> -isoeugenol<br>97541   |  | 18S<br>1-(3,5-dimethoxy-4-hydroxyphenyl)propyne<br>- |  | 28S<br><i>Trans</i> -sinapaldehyde<br>4206580    |  |
| 9G<br><i>Trans</i> -isoeugenol<br>97541 |  | 19S<br><i>Trans</i> -4-propenylsyringol<br>26624135  |  |                                                  |                                                                                       |
| 10S<br>4-methylsyringol<br>6638057      |  | 20S<br>Syringaldehyde<br>134963                      |  |                                                  |                                                                                       |

5 Identities of lignin-derived phenolic S and G compounds above 1% in relative occurrence. Identified with Py-GC/MS.

6 **Table S2:** Molar area distribution of identified G residues (>1% ) over total G residues in WSL pyrograms. The summed molar areas of identified G residues were normalized  
 7 to 100%. Values are given in percent.

| Sample           | Guaiacol | 4-methylguaiacol | 4-ethylguaiacol | 4-vinylguaiacol | Eugenol | 4-propylguaiacol | Vanillin | Cis-isoeugenol | Trans-isoeugenol | Acetovanillone | Guaiacylacetone | Coniferaldehyde | Trans-coniferyl-alcohol |
|------------------|----------|------------------|-----------------|-----------------|---------|------------------|----------|----------------|------------------|----------------|-----------------|-----------------|-------------------------|
| <b>Blank</b>     | 15±0     | 14±0             | 4±1             | 40±2            | 2±0     | 0±0              | 6±0      | 1±0            | 6±0              | 3±1            | 3±0             | 2±0             | 5±0                     |
| <b>TvL</b>       | 15±0     | 15±0             | 5±1             | 36±4            | 1±0     | 0±0              | 6±1      | 1±0            | 6±0              | 4±1            | 3±0             | 2±0             | 5±0                     |
| <b>Pol</b>       | 14±0     | 15±1             | 4±1             | 38±2            | 1±0     | 1±0              | 6±1      | 1±0            | 6±0              | 4±0            | 3±0             | 2±0             | 6±1                     |
| <b>HBT</b>       | 13±1     | 13±1             | 3±0             | 42±1            | 1±0     | 1±0              | 5±1      | 1±0            | 6±1              | 3±0            | 3±0             | 1±0             | 8±0                     |
| <b>TvL+HBT</b>   | 14±1     | 13±1             | 5±0             | 38±1            | 1±0     | 0±0              | 6±0      | 1±0            | 5±0              | 4±0            | 3±0             | 2±0             | 8±1                     |
| <b>Pol+HBT</b>   | 14±0     | 13±1             | 5±0             | 38±2            | 1±0     | 0±0              | 6±0      | 1±0            | 5±0              | 4±0            | 3±0             | 2±0             | 7±1                     |
| <b>HPI</b>       | 14±1     | 13±0             | 4±1             | 42±3            | 1±0     | 0±0              | 4±0      | 1±0            | 6±0              | 3±0            | 3±0             | 1±0             | 8±1                     |
| <b>TvL+HPI</b>   | 14±1     | 13±1             | 4±1             | 38±1            | 1±0     | 0±0              | 6±0      | 1±0            | 6±0              | 5±0            | 3±0             | 2±0             | 6±0                     |
| <b>Pol+HPI</b>   | 14±1     | 13±1             | 5±1             | 38±2            | 1±0     | 1±0              | 7±1      | 1±0            | 6±0              | 5±0            | 3±0             | 2±0             | 5±1                     |
| <b>TEMPO</b>     | 14±1     | 12±1             | 4±0             | 41±2            | 1±0     | 0±0              | 6±0      | 1±0            | 5±0              | 3±1            | 3±0             | 2±0             | 8±1                     |
| <b>TvL+TEMPO</b> | 14±0     | 14±0             | 5±1             | 36±1            | 1±0     | 0±0              | 10±0     | 1±0            | 5±0              | 4±0            | 3±0             | 2±0             | 6±1                     |
| <b>Pol+TEMPO</b> | 14±0     | 13±1             | 5±1             | 37±2            | 1±0     | 1±0              | 9±0      | 1±0            | 5±0              | 4±0            | 3±0             | 2±0             | 5±0                     |
| <b>ABTS</b>      | 14±0     | 14±1             | 4±1             | 42±1            | 1±0     | 0±0              | 5±0      | 1±0            | 6±0              | 2±0            | 3±0             | 2±0             | 6±0                     |
| <b>TvL+ABTS</b>  | 14±1     | 16±2             | 3±0             | 39±3            | 1±0     | 1±0              | 5±0      | 1±0            | 5±0              | 3±0            | 3±0             | 8±2             | 2±0                     |
| <b>Pol+ABTS</b>  | 13±1     | 15±1             | 3±0             | 39±1            | 1±0     | 0±0              | 6±1      | 1±0            | 4±0              | 3±0            | 3±0             | 11±1            | 1±0                     |

8

9

10

11

12

13

14 **Table S3:** Molar area distribution of identified S residues (>1% ) over total S residues in WSL pyrograms. The summed molar areas of identified G residues were normalized  
15 to 100%. Values are given in percent.

| Sample    | Syringol | 4-methylsyringol | 4-vinylsyringol | 4-allylsyringol | Syringaldehyde | Cis-4-propenylsyringol | Homosyringaldehyde | Cis-1-(3,5-dimethoxy-4-hydroxyphenyl)propyne | Trans-1-(3,5-dimethoxy-4-hydroxyphenyl)propyne | Trans-4-propenylsyringol | Acetosyringone | Syringylactone | Cis-Sinapyl alcohol | Sinapaldehyde | Trans-Sinapyl alcohol |
|-----------|----------|------------------|-----------------|-----------------|----------------|------------------------|--------------------|----------------------------------------------|------------------------------------------------|--------------------------|----------------|----------------|---------------------|---------------|-----------------------|
| Blank     | 17±2     | 15±2             | 20±2            | 2±0             | 6±1            | 1±0                    | 4±1                | 2±0                                          | 7±9                                            | 9±1                      | 8±0            | 4±1            | 0±0                 | 2±0           | 4±0                   |
| TvL       | 17±1     | 15±1             | 19±1            | 2±0             | 8±0            | 1±0                    | 5±1                | 1±0                                          | 2±1                                            | 9±0                      | 10±0           | 4±0            | 0±0                 | 3±0           | 3±0                   |
| PoL       | 18±1     | 15±1             | 19±1            | 2±0             | 8±1            | 1±0                    | 4±0                | 2±0                                          | 1±1                                            | 10±1                     | 10±0           | 5±0            | 0±0                 | 3±0           | 3±0                   |
| HBT       | 18±1     | 13±1             | 21±1            | 2±0             | 6±1            | 1±0                    | 5±1                | 1±0                                          | 1±1                                            | 11±1                     | 8±0            | 4±0            | 0±0                 | 2±0           | 6±1                   |
| TvL+HBT   | 18±1     | 14±1             | 19±1            | 2±0             | 8±0            | 1±0                    | 4±1                | 2±0                                          | 1±2                                            | 10±0                     | 11±0           | 5±0            | 0±0                 | 3±0           | 6±0                   |
| PoL+HBT   | 18±2     | 13±1             | 19±1            | 2±0             | 8±0            | 1±0                    | 4±0                | 1±0                                          | 1±1                                            | 10±1                     | 10±1           | 4±0            | 0±0                 | 2±0           | 5±0                   |
| HPI       | 17±2     | 13±2             | 19±2            | 2±0             | 6±0            | 1±0                    | 4±0                | 2±0                                          | 6±10                                           | 9±2                      | 8±1            | 4±0            | 0±0                 | 2±0           | 6±2                   |
| TvL+HPI   | 18±1     | 13±1             | 19±1            | 2±0             | 7±0            | 1±0                    | 4±0                | 1±0                                          | 3±4                                            | 9±1                      | 12±1           | 5±0            | 0±0                 | 2±0           | 4±0                   |
| PoL+HPI   | 19±1     | 14±1             | 18±1            | 2±0             | 7±1            | 1±0                    | 4±1                | 1±0                                          | 1±1                                            | 10±1                     | 12±0           | 5±0            | 0±0                 | 2±0           | 4±1                   |
| TEMPO     | 19±1     | 13±1             | 20±1            | 2±0             | 7±0            | 1±0                    | 5±0                | 1±0                                          | 2±1                                            | 9±1                      | 8±0            | 4±0            | 0±0                 | 3±0           | 6±0                   |
| TvL+TEMPO | 17±1     | 14±0             | 18±0            | 2±0             | 11±1           | 1±0                    | 4±0                | 1±0                                          | 0±0                                            | 9±1                      | 11±1           | 5±0            | 0±0                 | 3±0           | 5±1                   |
| PoL+TEMPO | 18±1     | 13±1             | 18±1            | 2±0             | 11±0           | 1±1                    | 4±1                | 1±0                                          | 1±2                                            | 9±1                      | 11±1           | 4±0            | 0±0                 | 3±0           | 4±0                   |
| ABTS      | 17±0     | 15±0             | 22±1            | 2±0             | 6±0            | 1±0                    | 5±1                | 2±0                                          | 0±0                                            | 12±1                     | 8±0            | 4±0            | 0±0                 | 2±0           | 4±0                   |
| TvL+ABTS  | 17±1     | 16±1             | 21±0            | 2±0             | 7±0            | 1±0                    | 8±0                | 2±0                                          | 3±3                                            | 9±0                      | 9±1            | 5±0            | 0±0                 | 2±0           | 1±0                   |
| PoL+ABTS  | 16±3     | 15±2             | 20±3            | 2±0             | 6±1            | 1±0                    | 7±1                | 2±0                                          | 9±13                                           | 8±1                      | 8±1            | 4±1            | 0±0                 | 2±1           | 1±0                   |

16

17

18

19

20 **Table S4.** Molar area distribution of identified G residues (>1% ) over total G residues in BOL pyrograms. The summed molar areas of identified G residues were normalized  
 21 to 100%. Values are given in percent.

| Sample    | Guaiacol | 4-methylguaiacol | 4-ethylguaiacol | 4-vinylguaiacol | Eugenol | 4-propylguaiacol | Vanillin | Cis-isoegenol | Trans-isoegenol | Acetovanillone | Guaiacylacetone | Propiovanillone | Coniferaldehyde | Trans-coniferyl-alcohol |
|-----------|----------|------------------|-----------------|-----------------|---------|------------------|----------|---------------|-----------------|----------------|-----------------|-----------------|-----------------|-------------------------|
| Blank     | 16±1     | 20±2             | 4±0             | 17±1            | 1±0     | 1±0              | 11±0     | 1±0           | 7±1             | 6±0            | 4±0             | 0±0             | 4±0             | 8±1                     |
| TvL       | 16±1     | 21±1             | 4±0             | 17±1            | 2±0     | 1±0              | 11±0     | 1±0           | 8±0             | 6±0            | 4±0             | 0±0             | 3±0             | 7±1                     |
| Pol       | 17±2     | 18±2             | 3±1             | 17±1            | 1±0     | 1±0              | 11±0     | 1±0           | 7±0             | 6±0            | 4±0             | 0±0             | 3±0             | 10±2                    |
| HBT       | 15±1     | 20±1             | 4±0             | 16±1            | 2±0     | 1±0              | 11±0     | 1±0           | 7±1             | 6±0            | 3±0             | 1±0             | 3±0             | 8±1                     |
| TvL+HBT   | 15±1     | 20±1             | 4±0             | 16±1            | 1±0     | 1±0              | 11±1     | 1±0           | 7±0             | 6±0            | 4±0             | 0±0             | 3±0             | 9±1                     |
| Pol+HBT   | 15±1     | 20±1             | 4±0             | 16±0            | 1±0     | 1±0              | 11±0     | 1±0           | 7±0             | 6±0            | 4±0             | 0±0             | 3±0             | 9±1                     |
| HPI       | 16±1     | 21±1             | 4±0             | 15±1            | 2±0     | 1±0              | 10±0     | 1±0           | 7±0             | 6±0            | 3±0             | 0±0             | 3±0             | 9±0                     |
| TvL+HPI   | 17±1     | 19±1             | 4±0             | 16±1            | 1±0     | 1±0              | 10±1     | 1±0           | 7±0             | 6±0            | 4±0             | 0±0             | 3±0             | 8±1                     |
| Pol+HPI   | 17±1     | 20±1             | 4±0             | 16±0            | 1±0     | 1±0              | 10±0     | 1±0           | 7±0             | 6±0            | 4±0             | 0±0             | 3±0             | 8±0                     |
| TEMPO     | 15±1     | 21±2             | 4±0             | 16±0            | 1±0     | 1±0              | 12±0     | 1±0           | 7±0             | 5±0            | 4±0             | 0±0             | 3±0             | 7±1                     |
| TvL+TEMPO | 15±1     | 20±2             | 4±0             | 16±0            | 1±0     | 1±0              | 13±0     | 1±0           | 7±0             | 6±0            | 4±0             | 1±0             | 3±0             | 7±1                     |
| Pol+TEMPO | 15±0     | 21±1             | 4±0             | 15±0            | 1±0     | 1±0              | 13±1     | 1±0           | 7±0             | 6±0            | 4±0             | 0±0             | 3±0             | 7±1                     |
| ABTS      | 16±1     | 27±0             | 5±0             | 20±1            | 1±0     | 1±0              | 9±0      | 1±0           | 6±0             | 4±0            | 5±0             | 0±0             | 2±0             | 2±0                     |
| TvL+ABTS  | 18±1     | 28±0             | 5±0             | 20±1            | 1±0     | 1±0              | 9±0      | 1±0           | 6±0             | 3±0            | 5±0             | 0±0             | 2±0             | 1±0                     |
| Pol+ABTS  | 18±1     | 28±1             | 5±0             | 20±1            | 1±0     | 1±1              | 9±0      | 1±0           | 6±0             | 3±0            | 5±0             | 0±0             | 1±0             | 1±0                     |

22

23

24

25

26 **Table S5.** Molar area distribution of identified S residues (>1% ) over total S residues in BOL pyrograms. The summed molar areas of identified G residues were normalized  
 27 to 100%. Values are given in percent.

| Sample    | Syringol | 4-methylsyringol | 4-vinylsyringol | 4-allylsyringol | Syringaldehyde | Cis-4-propenylsyringol | Homosyringaldehyde | Cis-1-(3,5-dimethoxy-4-hydroxyphenyl)propyne | Trans-1-(3,5-dimethoxy-4-hydroxyphenyl)propyne | Trans-4-propenylsyringol | Acetosyringone | Syringylactone | Cis-Sinapyl alcohol | Sinapaldehyde | Trans-Sinapyl alcohol |
|-----------|----------|------------------|-----------------|-----------------|----------------|------------------------|--------------------|----------------------------------------------|------------------------------------------------|--------------------------|----------------|----------------|---------------------|---------------|-----------------------|
| Blank     | 14±1     | 15±2             | 13±1            | 2±0             | 15±1           | 1±0                    | 9±0                | 1±0                                          | 1±0                                            | 8±1                      | 8±0            | 4±0            | 0±0                 | 3±0           | 7±1                   |
| TvL       | 14±2     | 15±1             | 13±1            | 2±0             | 14±0           | 1±0                    | 8±0                | 1±0                                          | 1±0                                            | 9±0                      | 8±0            | 4±0            | 1±0                 | 3±0           | 6±0                   |
| PoL       | 14±2     | 13±2             | 14±0            | 2±0             | 15±1           | 1±0                    | 8±1                | 1±0                                          | 1±0                                            | 8±1                      | 8±0            | 4±0            | 1±0                 | 3±0           | 8±1                   |
| HBT       | 13±1     | 15±1             | 13±0            | 2±0             | 14±0           | 1±0                    | 8±0                | 1±0                                          | 1±0                                            | 9±1                      | 8±0            | 4±0            | 1±0                 | 3±0           | 7±0                   |
| TvL+HBT   | 14±2     | 15±1             | 13±0            | 2±0             | 14±0           | 1±0                    | 8±1                | 1±0                                          | 1±0                                            | 9±0                      | 8±0            | 4±0            | 1±0                 | 3±0           | 7±1                   |
| PoL+HBT   | 13±1     | 15±1             | 13±0            | 2±0             | 14±0           | 1±0                    | 8±0                | 1±1                                          | 1±0                                            | 9±0                      | 8±0            | 4±0            | 1±0                 | 3±0           | 7±1                   |
| HPI       | 14±1     | 15±0             | 12±0            | 2±0             | 14±1           | 1±0                    | 7±0                | 1±0                                          | 1±0                                            | 9±0                      | 8±0            | 3±0            | 1±0                 | 3±0           | 7±0                   |
| TvL+HPI   | 15±1     | 14±0             | 14±1            | 2±0             | 14±1           | 1±0                    | 8±1                | 1±0                                          | 1±0                                            | 9±1                      | 8±0            | 4±0            | 0±0                 | 3±0           | 7±0                   |
| PoL+HPI   | 16±1     | 15±1             | 13±1            | 2±0             | 13±0           | 1±0                    | 7±0                | 1±0                                          | 1±0                                            | 10±0                     | 8±0            | 4±0            | 0±0                 | 3±0           | 6±0                   |
| TEMPO     | 13±1     | 15±1             | 14±1            | 2±0             | 15±0           | 1±0                    | 8±0                | 1±0                                          | 1±0                                            | 9±1                      | 7±0            | 4±0            | 1±0                 | 3±0           | 6±0                   |
| TvL+TEMPO | 14±1     | 14±1             | 13±1            | 2±0             | 15±0           | 1±0                    | 8±0                | 1±0                                          | 1±0                                            | 9±1                      | 8±0            | 4±0            | 1±0                 | 3±0           | 6±0                   |
| PoL+TEMPO | 13±0     | 16±1             | 13±0            | 2±0             | 15±0           | 1±0                    | 8±0                | 1±0                                          | 1±0                                            | 10±0                     | 8±0            | 4±0            | 0±0                 | 3±0           | 6±0                   |
| ABTS      | 15±2     | 22±0             | 16±1            | 2±0             | 10±0           | 1±0                    | 8±0                | 2±0                                          | 1±0                                            | 9±0                      | 4±0            | 5±0            | 0±0                 | 3±0           | 1±0                   |
| TvL+ABTS  | 16±1     | 22±1             | 17±1            | 2±0             | 10±1           | 1±0                    | 9±0                | 2±0                                          | 1±0                                            | 8±0                      | 4±0            | 6±0            | 0±0                 | 3±0           | 1±0                   |
| PoL+ABTS  | 17±0     | 23±1             | 16±0            | 2±0             | 10±1           | 1±0                    | 9±0                | 2±0                                          | 1±0                                            | 8±0                      | 4±0            | 5±0            | 0±0                 | 3±0           | 1±0                   |

28

29

30 a)

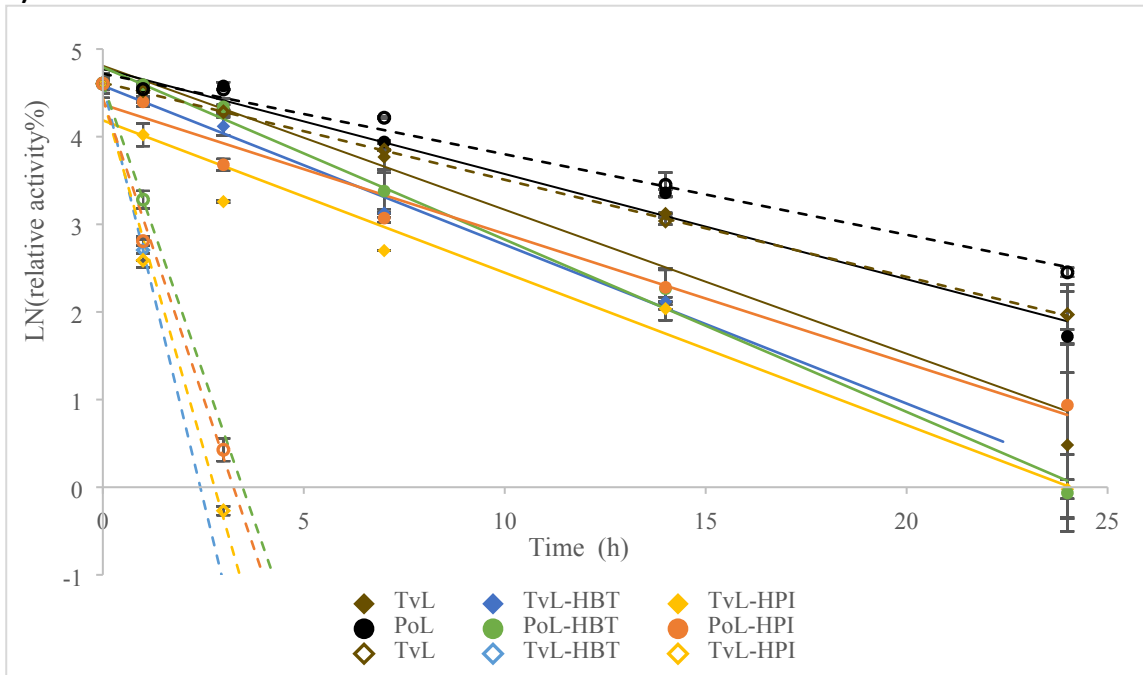

31  
32  
33

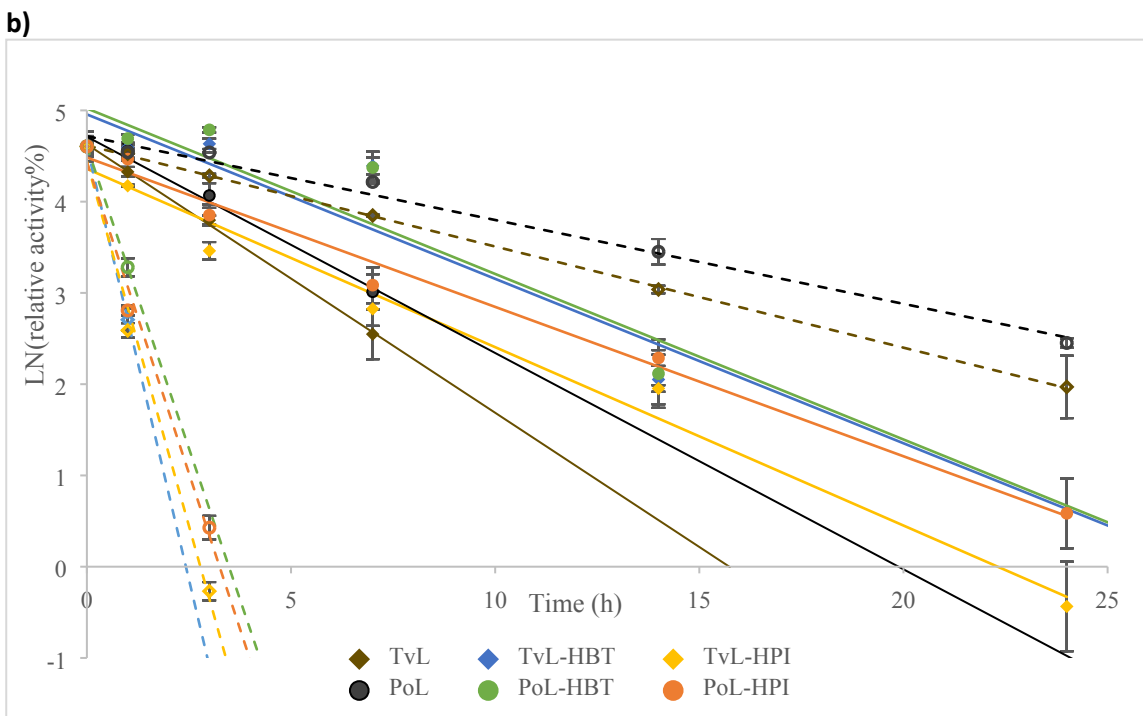

34  
35  
36  
37

38 **Figure S1:** Decay of activity measured on syringaldehyde of a) TvL and PoL and in combination with HBT and  
39 HPI during treatment on WSL (—) and no substrate (- - -). b) TvL and PoL and in combination with HBT  
40 and HPI during treatment on BOL (—) and no substrate (- - -). Data points are averages of two  
41 independent samplings shown with  $\pm$  s.d. as a vertical bar for each point.  
42
